# Supplementary material
Source: publisher site journal article supplement (https://www.dovepress.com/article/338560)
Supplement: Supplementary file 1 [file get_supplementary_file.php]

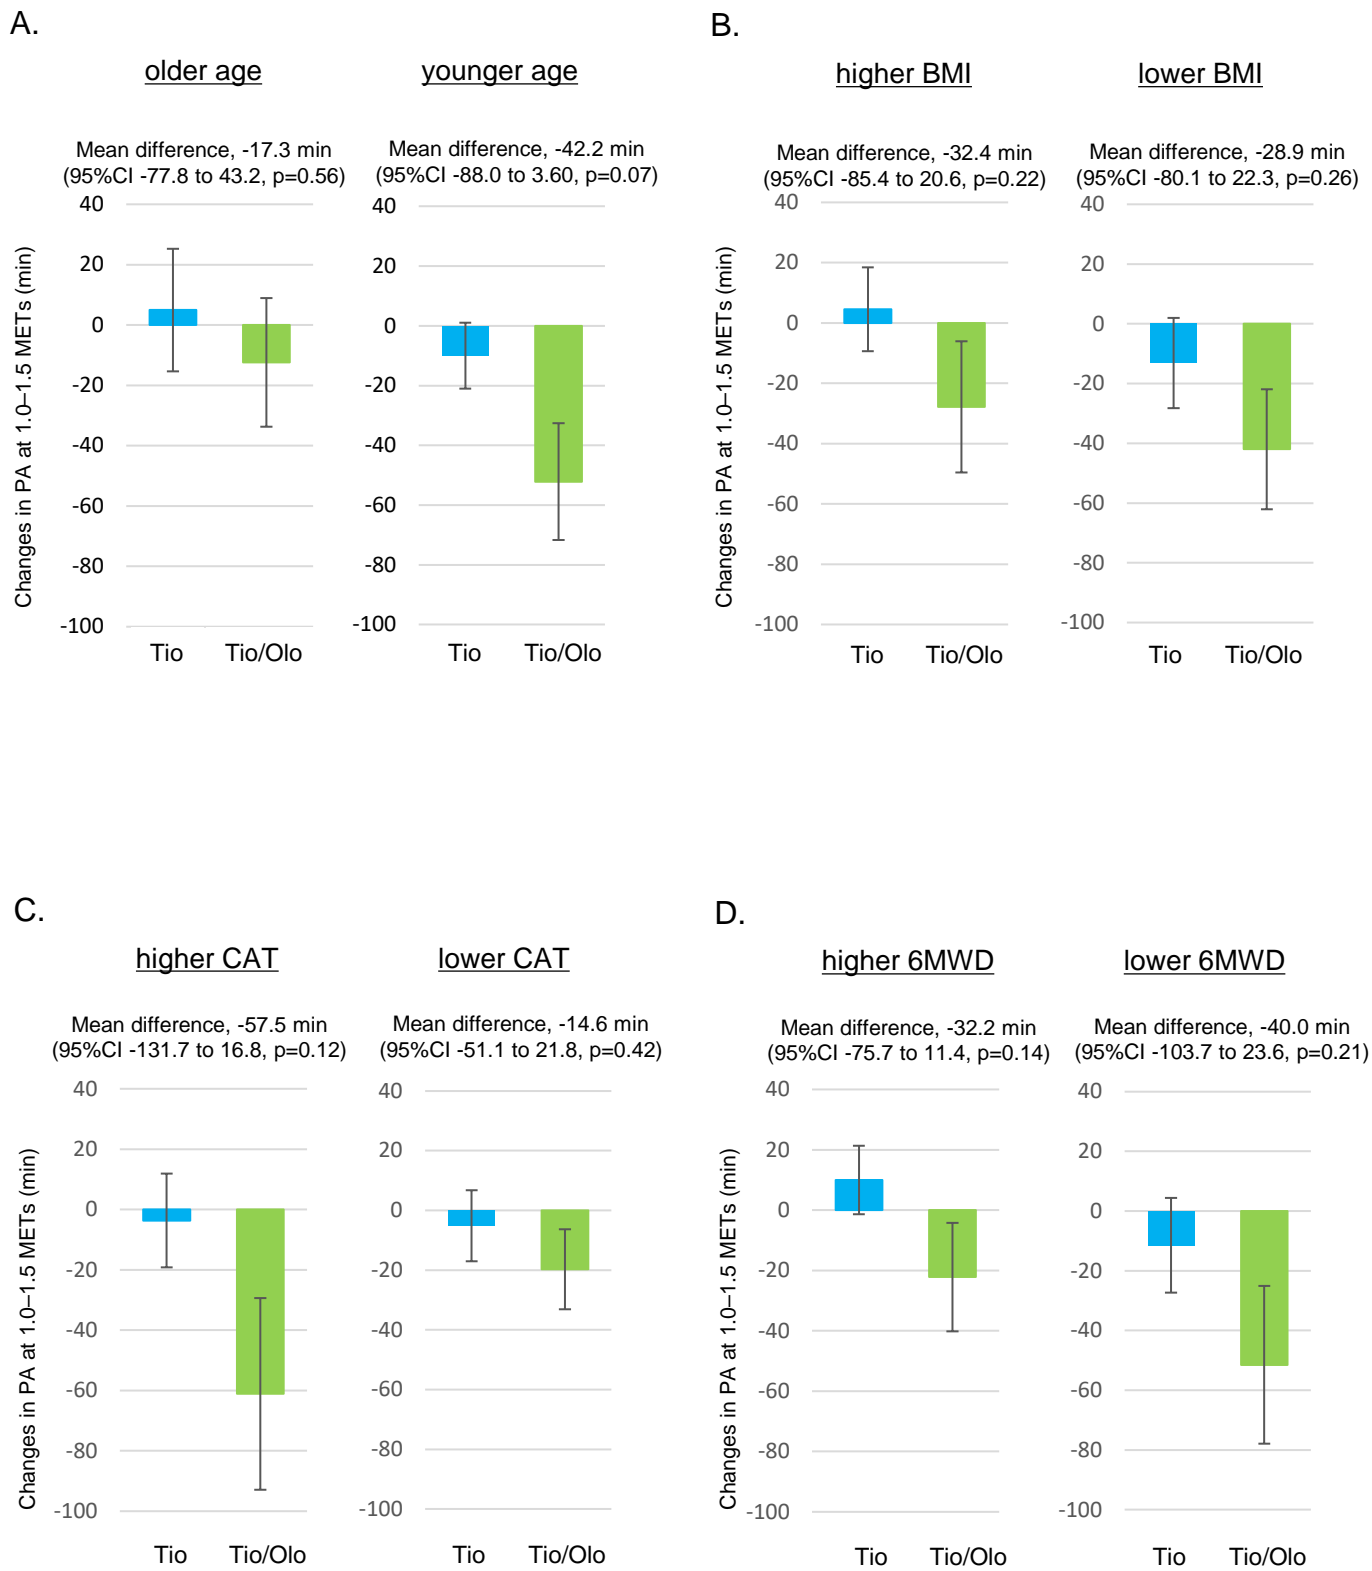

Supplemental Figure 1. Changes in sedentary time before and after treatment stratified by baseline characteristics

Patients were stratified into two groups by a median age of 70 years (A), median BMI of 22.9 kg/m<sup>2</sup> (B), median CAT score of 11 points (C), and median 6MWD of 455 m (D), for stratified analysis of factors associated with a reduction in sedentary time with Tio or Tio/Olo treatment. The error bars represent standard errors. p values show differences between two groups.

METs, metabolic equivalents; BMI, body mass index; CAT, COPD assessment test; 6MWD, 6-minute walk distance; Tio, tiotropium; Tio/Olo, tiotropium/olodaterol.

Supplementary table 1. The list of Investigator, center, and IRB

| Investigator name  | Center name (location)<br>(location)             | IRB<br>(location)   | Approval date<br>(number)        |
|--------------------|--------------------------------------------------|---------------------|----------------------------------|
| Koichiro Takahashi | Saga University<br>(Saga, Japan)                 | Same as on the left | 6, March, 2017<br>(2016-12-01)   |
| Masaru Uchida      | Saga Central Hospital<br>(Saga, Japan)           | Same as on the left | 14, April, 2017 *                |
| Go Kato            | Saga Prefectural Medical Center<br>(Saga, Japan) | Same as on the left | 28, March, 2017<br>(17-04-01-05) |
| Makoto Yoshida     | Fukuoka Hospital<br>(Fukuoka, Japan)             | Same as on the left | 27, April, 2017<br>(F29-1)       |
| Tomotaka Kawayama  | Kurume University<br>(Fukuoka, Japan)            | Same as on the left | 15, May, 2017<br>(17029)         |
| Shinichiro Hayashi | Kouhoukai Takagi Hospital<br>(Fukuoka, Japan)    | Same as on the left | 7, August, 2017<br>(255)         |
| Hiroshi Inoue      | Karatsu Red Cross Hospital<br>(Saga, Japan)      | Same as on the left | 12, January, 2018<br>(9-1)       |
| Keisuke Kojima     | Imari Arita Kyouritsu Hospital<br>(Saga, Japan)  | Same as on the left | 14, March, 2018<br>(29-20)       |
| Hiromi Kobayashi   | East Saga Hospital<br>(Saga, Japan)              | Same as on the left | 30, March, 2018<br>(29-22)       |

Note: \* No reference number on the approval letter from IRB.

Abbreviation: IRB; institutional review board
